# Supplementary material for: Traditional Yellow Dyes Used in the 21st Century in Central Iran: The Knowledge of Master Dyers Revealed by HPLC-DAD and UHPLC-HRMS/MS
Source: MDPI journal article supplement (doi:10.3390/molecules25040908), 2020-02-18

|                                                                                     |   |       |          |                                                                                       |  |       |          |     |                                                                                       |  |  |
|-------------------------------------------------------------------------------------|---|-------|----------|---------------------------------------------------------------------------------------|--|-------|----------|-----|---------------------------------------------------------------------------------------|--|--|
| <i>Delphinium semibarbatum</i>                                                      |   |       |          |                                                                                       |  |       |          |     |                                                                                       |  |  |
| 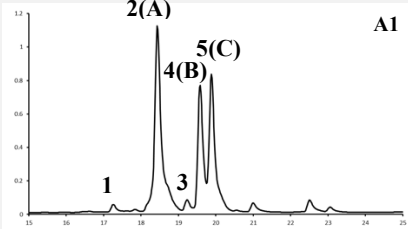   | 1 | 17.25 | 256, 355 |                                                                                       |  | 17.55 | 256, 356 | 610 |    |  |  |
|                                                                                     | 2 | 18.43 | 255, 355 |                                                                                       |  | 18.75 | 255, 355 | 464 |                                                                                       |  |  |
|                                                                                     | 3 | 19.23 | 263, 347 |                                                                                       |  | 19.55 | 264, 348 | 448 |                                                                                       |  |  |
|                                                                                     | 4 | 19.58 | 264, 347 |                                                                                       |  | 19.90 | 264, 347 | 448 |                                                                                       |  |  |
|                                                                                     | 5 | 19.89 | 254, 354 |                                                                                       |  | 20.19 | 254, 354 | 478 |                                                                                       |  |  |
|                                                                                     | 6 | -     | -        |                                                                                       |  | 21.35 | 254, 371 | 302 |                                                                                       |  |  |
|                                                                                     | 7 | -     | -        |                                                                                       |  | 22.87 | 264, 366 | 286 |                                                                                       |  |  |
|                                                                                     | 8 | -     | -        |                                                                                       |  | 23.40 | 254, 370 | 316 |                                                                                       |  |  |
|                                                                                     |   |       |          |    |  |       |          |     |                                                                                       |  |  |
| <i>Eremostachys laevigata</i>                                                       |   |       |          |                                                                                       |  |       |          |     |                                                                                       |  |  |
|    | 1 | 18.15 | 254, 348 |                                                                                       |  | 18.37 | 254, 349 | 580 |    |  |  |
|                                                                                     | 2 | 19.15 | 256, 345 |                                                                                       |  | 19.38 | 256, 344 | 448 |                                                                                       |  |  |
|                                                                                     | 3 | 20.07 | 254, 350 |                                                                                       |  | 20.28 | 254, 350 | 490 |                                                                                       |  |  |
|                                                                                     | 4 | -     | -        |                                                                                       |  | 21.55 | 254, 350 | 534 |                                                                                       |  |  |
|                                                                                     | 5 | -     | -        |                                                                                       |  | 21.98 | 254, 350 | 286 |                                                                                       |  |  |
|                                                                                     |   |       |          |    |  |       |          |     |                                                                                       |  |  |
| <i>Morus alba</i>                                                                   |   |       |          |                                                                                       |  |       |          |     |                                                                                       |  |  |
|   | 1 | 18.35 | 256, 356 |                                                                                       |  | 18.63 | 256, 356 | 610 |   |  |  |
|                                                                                     | 2 | 18.70 | 255, 355 |                                                                                       |  | 19.03 | 255, 355 | 464 |                                                                                       |  |  |
|                                                                                     | 3 | 19.43 | 264, 348 |                                                                                       |  | 19.77 | 264, 348 | 594 |                                                                                       |  |  |
|                                                                                     | 4 | 19.54 | 264, 347 |                                                                                       |  | 19.87 | 264, 347 | 448 |                                                                                       |  |  |
|                                                                                     | 5 | 20.00 | 264, 348 |                                                                                       |  | 20.33 | 264, 348 | 490 |                                                                                       |  |  |
|                                                                                     |   |       |          |   |  |       |          |     |                                                                                       |  |  |
| <i>Pistacia vera</i>                                                                |   |       |          |                                                                                       |  |       |          |     |                                                                                       |  |  |
|  | 1 | 16.94 | 262, 357 |                                                                                       |  | 17.25 | 264, 358 | 480 |  |  |  |
|                                                                                     | 2 | 17.55 | 276, 353 |                                                                                       |  | 17.88 | 278, 354 | 616 |                                                                                       |  |  |
|                                                                                     | 3 | 18.26 | 258, 355 |                                                                                       |  | 18.62 | 258, 355 | 478 |                                                                                       |  |  |
|                                                                                     | 4 | 18.74 | 265, 358 |                                                                                       |  | 19.10 | 265, 358 | 434 |                                                                                       |  |  |
|                                                                                     | 5 | 19.45 | 267, 350 |                                                                                       |  | 19.82 | 266, 352 | 630 |                                                                                       |  |  |
|                                                                                     | 6 | 21.58 | 254, 350 |                                                                                       |  | 22.00 | 254, 350 | 286 |                                                                                       |  |  |
|                                                                                     |   |       |          |  |  |       |          |     |                                                                                       |  |  |
| <i>Prangos ferulacea</i>                                                            |   |       |          |                                                                                       |  |       |          |     |                                                                                       |  |  |
|  | 1 | 18.25 | 256, 354 |                                                                                       |  | 18.60 | 256, 354 | 478 |  |  |  |
|                                                                                     | 2 | 20.07 | 254, 354 |                                                                                       |  | 20.33 | 254, 352 | 402 |                                                                                       |  |  |
|                                                                                     |   |       |          |  |  |       |          |     |                                                                                       |  |  |

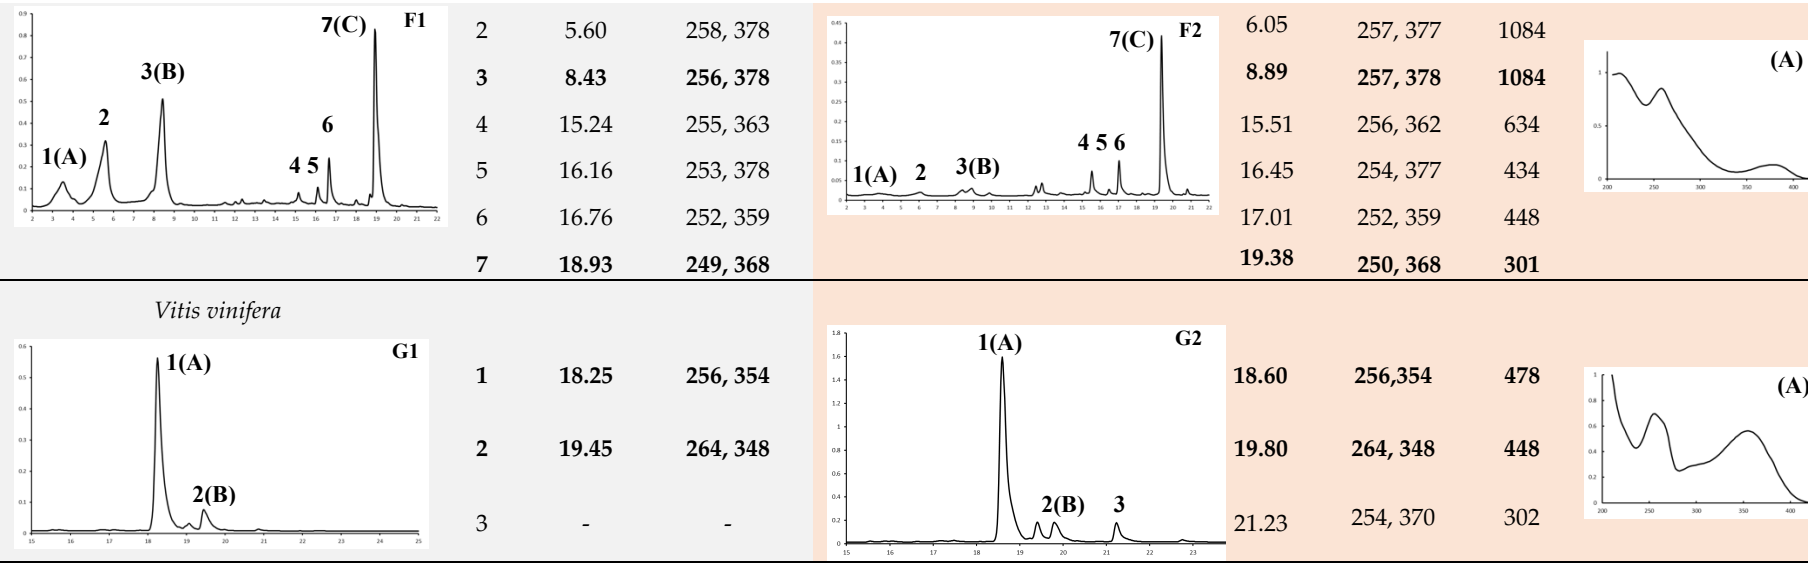

Supplement: s1 [file s1]
