# Supplementary material for: Traditional Yellow Dyes Used in the 21st Century in Central Iran: The Knowledge of Master Dyers Revealed by HPLC-DAD and UHPLC-HRMS/MS
Source: MDPI journal article supplement (doi:10.3390/molecules25040908), 2020-02-18
Supplement: s1 [file s1]

**Table S3.** Flavonoid references: common and scientific names, molecular structure, retention time, absorbance maxima and UV-VIS spectra as acquired by HPLC-DAD.

| Name                                                              | Structure                                                                           | t <sub>R</sub><br>(min) | λ <sub>max</sub><br>(nm) | Spectra UV-VIS                                                                       |
|-------------------------------------------------------------------|-------------------------------------------------------------------------------------|-------------------------|--------------------------|--------------------------------------------------------------------------------------|
| Luteolin 7-O-glucoside<br><br><i>Luteolin 7-O-β-D-glucoside</i>   | 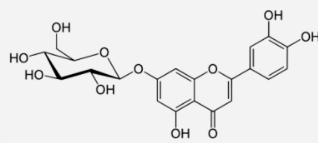   | 18.40                   | 254<br>350               |    |
| Quercetin<br><br><i>3,3',4',5,7-Pentahydroxyflavone dihydrate</i> |    | 20.90                   | 254<br>372               |    |
| Luteolin<br><br><i>3',4',5,7-Tetrahydroxyflavone</i>              |    | 21.76                   | 254<br>350               |    |
| Isorhamnetin<br><br><i>3'-Methylquercetin</i>                     |  | 23.30                   | 254<br>370               |  |
| Rhamnetin<br><br><i>7-Methoxyquercetin</i>                        |  | 23.65                   | 254<br>372               |  |
| Kaempferol<br><br><i>3,4',5,7-tetrahydroxyflavone</i>             |  | 22.39                   | 264<br>366               |  |
| Apigenin<br><br><i>5,7,4'-Trihydroxyflavone</i>                   |  | 22.80                   | 266<br>338               |  |

| Name                         | Structure                                                                         | $t_R$<br>(min) | $\lambda_{max}$<br>(nm) | Spectra UV-VIS                                                                     |
|------------------------------|-----------------------------------------------------------------------------------|----------------|-------------------------|------------------------------------------------------------------------------------|
| Luteolin-3',7-di-O-glucoside | 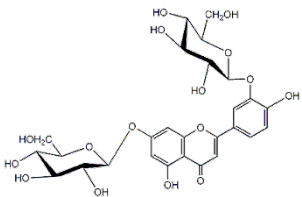 | 17.3           | 268<br>340              |  |
