# Supplementary material for: Traditional Yellow Dyes Used in the 21st Century in Central Iran: The Knowledge of Master Dyers Revealed by HPLC-DAD and UHPLC-HRMS/MS
Source: MDPI journal article supplement (doi:10.3390/molecules25040908), 2020-02-18
Supplement: s1 [file s1]

**Table S1.** HPLC-DAD and LC-ESI(-)-HRMS/MS characterization of the main yellow chromophores present in plant (Pl) and dyed wool (Tx) extracts.

|                                | Textile $t_R$ (min) |       | $\lambda_{max}$<br>(nm) | MF                                              | [M-H] <sup>-</sup> |            | $\Delta$<br>ppm | MS/MS<br>[ $m/z$ ( $\Delta$ ppm)(attribution)]                                                                                                                                                                                                                                                                                                                           | Proposed<br>compound | Pl   | Tx |
|--------------------------------|---------------------|-------|-------------------------|-------------------------------------------------|--------------------|------------|-----------------|--------------------------------------------------------------------------------------------------------------------------------------------------------------------------------------------------------------------------------------------------------------------------------------------------------------------------------------------------------------------------|----------------------|------|----|
|                                | HPLC                | UHPLC |                         |                                                 | Meas. $m/z$        | Cal. $m/z$ |                 |                                                                                                                                                                                                                                                                                                                                                                          |                      |      |    |
| <i>Delphinium semibarbatum</i> | 17.55               | 5.85  | 256, 356                | C <sub>27</sub> H <sub>30</sub> O <sub>16</sub> | 609.1467           | 609.1461   | -1.0            | 300.0277 (-0.4) [Y <sub>0</sub> -H <sup>+</sup> ] <sup>+</sup><br>[C <sub>15</sub> H <sub>8</sub> O <sub>7</sub> ] <sup>+</sup>                                                                                                                                                                                                                                          | Que-3-O-dexoxy-hex   | 1    | 1  |
|                                | 18.75               | 6.42  | 255, 355                | C <sub>21</sub> H <sub>20</sub> O <sub>12</sub> | 463.0876           | 463.0882   | 1.2             | 301.0347 (2.1) [Y <sub>0</sub> ] <sup>-</sup> [C <sub>15</sub> H <sub>9</sub> O <sub>7</sub> ] <sup>-</sup><br>300.0277 (-0.4) [Y <sub>0</sub> -H <sup>+</sup> ] <sup>+</sup><br>[C <sub>15</sub> H <sub>8</sub> O <sub>7</sub> ] <sup>+</sup><br>271.0250 (-0.7)[Y <sub>0</sub> -2H-CO] <sup>-</sup><br>[C <sub>14</sub> H <sub>7</sub> O <sub>5</sub> ] <sup>-</sup>   | Que-3-O-glu*         | 2    | 2  |
|                                | 19.55               | 6.79  | 264, 348                | C <sub>21</sub> H <sub>20</sub> O <sub>11</sub> | 447.0929           | 447.0933   | 0.8             | 284.0328 (-0.5) [Y <sub>0</sub> -H <sup>+</sup> ] <sup>+</sup><br>[C <sub>15</sub> H <sub>8</sub> O <sub>6</sub> ] <sup>+</sup><br>255.0303 (-1.3)[Y <sub>0</sub> -2H-CO] <sup>-</sup><br>[C <sub>14</sub> H <sub>7</sub> O <sub>5</sub> ] <sup>-</sup>                                                                                                                  | Kae-hex              | 3    | 3  |
|                                | 19.90               | 7.04  | 264, 347                | C <sub>21</sub> H <sub>20</sub> O <sub>11</sub> | 447.0931           | 447.0933   | 0.5             | 285.0402 (0.8) [Y <sub>0</sub> ] <sup>-</sup> [C <sub>15</sub> H <sub>9</sub> O <sub>6</sub> ] <sup>-</sup><br>284.0328 (-0.5) [Y <sub>0</sub> -H <sup>+</sup> ] <sup>+</sup><br>[C <sub>15</sub> H <sub>8</sub> O <sub>6</sub> ] <sup>+</sup><br>255.0291 (3.3) [Y <sub>0</sub> -2H-CO] <sup>-</sup><br>[C <sub>14</sub> H <sub>7</sub> O <sub>5</sub> ] <sup>-</sup>   | Kae-3-O-glu*         | 4    | 4  |
|                                | 20.19               | 7.11  | 254, 354                | C <sub>22</sub> H <sub>22</sub> O <sub>12</sub> | 477.1040           | 477.1038   | -0.3            | 315.0505 (1.6) [Y <sub>0</sub> ] <sup>-</sup> [C <sub>16</sub> H <sub>11</sub> O <sub>7</sub> ] <sup>-</sup><br>314.0433 (-0.2) [Y <sub>0</sub> -H <sup>+</sup> ] <sup>+</sup><br>[C <sub>16</sub> H <sub>10</sub> O <sub>7</sub> ] <sup>+</sup><br>285.0409 (-1.6)[Y <sub>0</sub> -2H-CO] <sup>-</sup><br>[C <sub>15</sub> H <sub>9</sub> O <sub>6</sub> ] <sup>-</sup> | Irh-3-O-glu          | 5    | 5  |
|                                | 21.35               | 9.27  | 254, 371                | C <sub>15</sub> H <sub>10</sub> O <sub>7</sub>  | 301.0359           | 301.0354   | -1.7            | 178.9980 (-0.4) [ <sup>1,2</sup> A] <sup>-</sup> [C <sub>8</sub> H <sub>3</sub> O <sub>5</sub> ] <sup>-</sup><br>151.0037 (-0.7) [ <sup>1,2</sup> A-CO] <sup>-</sup><br>[C <sub>7</sub> H <sub>3</sub> O <sub>4</sub> ] <sup>-</sup><br>121.0280 (10.0) [ <sup>1,2</sup> B] <sup>-</sup> [C <sub>7</sub> H <sub>5</sub> O <sub>2</sub> ] <sup>-</sup>                    | Que*                 | n.a. | 6  |
|                                | 22.87               | 10.63 | 264, 366                | C <sub>15</sub> H <sub>10</sub> O <sub>6</sub>  | 285.0413           | 285.0405   | -2.9            | 151.0036 (0.7) [ <sup>1,3</sup> A] <sup>-</sup> [C <sub>7</sub> H <sub>3</sub> O <sub>4</sub> ] <sup>-</sup>                                                                                                                                                                                                                                                             | Kae*                 | n.a. | 7  |
|                                | 23.40               | 10.91 | 254, 370                | C <sub>16</sub> H <sub>12</sub> O <sub>7</sub>  | 315.0519           | 315.0510   | -2.7            | 300.0282 (-2.0) [C <sub>15</sub> H <sub>8</sub> O <sub>7</sub> ] <sup>-</sup><br>151.0037 (-0.7) [ <sup>1,2</sup> A-CO] <sup>-</sup><br>[C <sub>7</sub> H <sub>3</sub> O <sub>4</sub> ] <sup>-</sup>                                                                                                                                                                     | Irh*                 | n.a. | 8  |

|                               | Textile $t_R$ (min) |       | $\lambda_{max}$<br>(nm) | MF                                              | [M-H] <sup>-</sup> |            | $\Delta$<br>ppm | MS/MS<br>[ $m/z$ ( $\Delta$ ppm)(attribution)]                                                                                                                                                                                                                                                                                                                                 | Proposed<br>compound                                                                | PI   | Tx   |
|-------------------------------|---------------------|-------|-------------------------|-------------------------------------------------|--------------------|------------|-----------------|--------------------------------------------------------------------------------------------------------------------------------------------------------------------------------------------------------------------------------------------------------------------------------------------------------------------------------------------------------------------------------|-------------------------------------------------------------------------------------|------|------|
|                               | HPLC                | UHPLC |                         |                                                 | Meas. $m/z$        | Cal. $m/z$ |                 |                                                                                                                                                                                                                                                                                                                                                                                |                                                                                     |      |      |
| <i>Eremostachys laevigata</i> | 18.37               | 6.18  | 254, 349                | C <sub>26</sub> H <sub>28</sub> O <sub>15</sub> | 579.1362           | 579.1355   | -0.7            | 285.0404 (-0.2) [Y <sub>0</sub> ] <sup>-</sup> [C <sub>15</sub> H <sub>9</sub> O <sub>6</sub> ] <sup>-</sup>                                                                                                                                                                                                                                                                   | 7-O-[ $\beta$ -D-arabinopyranosyl-(1 $\rightarrow$ 6)- $\beta$ -D-glucosyl]luteolin | 1    | 1    |
|                               | -                   | 6.37  | n.a.                    | C <sub>27</sub> H <sub>30</sub> O <sub>15</sub> | 593.1519           | 593.1512   | -0.7            | 447.0936 (-0.3) [C <sub>21</sub> H <sub>19</sub> O <sub>11</sub> ] <sup>-</sup><br>285.0404 (-1.3) [Y <sub>0</sub> ] <sup>-</sup> [C <sub>15</sub> H <sub>9</sub> O <sub>6</sub> ] <sup>-</sup><br>284.0328 (-0.5) [Y <sub>0</sub> -H <sup>+</sup> ] <sup>-</sup><br>[C <sub>15</sub> H <sub>8</sub> O <sub>6</sub> ] <sup>-</sup>                                             | Luteolin-7-O-rutinoside                                                             | n.a. | n.a. |
|                               | 19.38               | 6.49  | 256, 345                | C <sub>21</sub> H <sub>20</sub> O <sub>11</sub> | 447.0938           | 447.0933   | -0.5            | 285.0406 (-0.3) [Y <sub>0</sub> ] <sup>-</sup> [C <sub>15</sub> H <sub>9</sub> O <sub>6</sub> ] <sup>-</sup><br>284.0331 (-1.6) [Y <sub>0</sub> -H <sup>+</sup> ] <sup>-</sup><br>[C <sub>15</sub> H <sub>8</sub> O <sub>6</sub> ] <sup>-</sup>                                                                                                                                | Lut-7-O-glu*                                                                        | 2    | 2    |
|                               | 20.28               | 7.18  | 254, 350                | C <sub>23</sub> H <sub>22</sub> O <sub>12</sub> | 489.1040           | 489.1038   | -0.1            | 447.0932 (0.1) [C <sub>21</sub> H <sub>19</sub> O <sub>11</sub> ] <sup>-</sup><br>285.0407 (-0.8) [Y <sub>0</sub> ] <sup>-</sup> [C <sub>15</sub> H <sub>9</sub> O <sub>6</sub> ] <sup>-</sup><br>284.0328 (-0.7) [Y <sub>0</sub> -H <sup>+</sup> ] <sup>-</sup><br>[C <sub>15</sub> H <sub>8</sub> O <sub>6</sub> ] <sup>-</sup>                                              | Lut-acetyl-hex                                                                      | 3    | 3    |
|                               | 21.55               | 8.08  | 254, 350                | C <sub>24</sub> H <sub>22</sub> O <sub>14</sub> | 533.0939           | 533.0937   | -0.3            | 489.10438 (0.1) [C <sub>23</sub> H <sub>22</sub> O <sub>12</sub> ] <sup>-</sup><br>285.0408 (-1.0) [Y <sub>0</sub> ] <sup>-</sup> [C <sub>15</sub> H <sub>9</sub> O <sub>6</sub> ] <sup>-</sup>                                                                                                                                                                                | Lut-manoyl-hex                                                                      | n.a. | 4    |
|                               | 21.98               | 9.15  | 254, 350                | C <sub>15</sub> H <sub>10</sub> O <sub>6</sub>  | 285.0408           | 285.0405   | -0.4            | 151.0034 (-0.7) [ <sup>1,3</sup> A] <sup>-</sup> [C <sub>7</sub> H <sub>3</sub> O <sub>4</sub> ] <sup>-</sup><br>133.0283 (9.0) [ <sup>1,3</sup> B] <sup>-</sup> [C <sub>8</sub> H <sub>5</sub> O <sub>2</sub> ] <sup>-</sup>                                                                                                                                                  | Lut*                                                                                | n.a. | 5    |
| <i>Morus Alba</i>             | 18.63               | 6.08  | 256, 356                | C <sub>27</sub> H <sub>30</sub> O <sub>16</sub> | 609.14670          | 609.1461   | -1.5            | 301.0346 (2.6) [Y <sub>0</sub> ] <sup>-</sup> [C <sub>15</sub> H <sub>9</sub> O <sub>7</sub> ] <sup>-</sup><br><br>300.0278 (-0.4) [Y <sub>0</sub> -H <sup>+</sup> ] <sup>-</sup><br>[C <sub>15</sub> H <sub>8</sub> O <sub>7</sub> ] <sup>-</sup><br><br>271.0250(-0.5) [Y <sub>0</sub> -2H-CO] <sup>-</sup><br>[C <sub>14</sub> H <sub>7</sub> O <sub>6</sub> ] <sup>-</sup> | Que-3-O-rutinoside*                                                                 | 1    | 1    |

|                      | Textile $t_R$ (min) |       | $\lambda_{max}$<br>(nm) | MF                                              | [M-H] <sup>-</sup> |                       | $\Delta$<br>ppm | MS/MS<br>[ $m/z$ ( $\Delta$ ppm)(attribution)]                                                                                                                                                                                                                                                                                                                                                                                                            | Proposed<br>compound | PI | Tx |
|----------------------|---------------------|-------|-------------------------|-------------------------------------------------|--------------------|-----------------------|-----------------|-----------------------------------------------------------------------------------------------------------------------------------------------------------------------------------------------------------------------------------------------------------------------------------------------------------------------------------------------------------------------------------------------------------------------------------------------------------|----------------------|----|----|
|                      | HPLC                | UHPLC |                         |                                                 | Meas. $m/z$        | Cal. $m/z$            |                 |                                                                                                                                                                                                                                                                                                                                                                                                                                                           |                      |    |    |
|                      | 19.03               | 6.41  | 255, 355                | C <sub>21</sub> H <sub>20</sub> O <sub>12</sub> | 463.0883           | 463.0882              | -0.3            | 300.0276 (-0.1) [Y <sub>0</sub> -H <sup>+</sup> ] <sup>+</sup><br>[C <sub>15</sub> H <sub>8</sub> O <sub>7</sub> ] <sup>+</sup><br><br>271.0250 (-1.9) [Y <sub>0</sub> -2H-<br>CO][C <sub>14</sub> H <sub>7</sub> O <sub>5</sub> ] <sup>-</sup>                                                                                                                                                                                                           | Que-3-O-glu*         | 2  | 2  |
|                      | 19.77               | 6.66  | 264, 348                | C <sub>27</sub> H <sub>30</sub> O <sub>15</sub> | 593.1513           | 593.1512              | -0.2            | 447.0935 (-0.6) [C <sub>21</sub> H <sub>19</sub> O <sub>11</sub> ] <sup>-</sup><br>285.0403 (-0.5) [Y <sub>0</sub> ] <sup>-</sup> [C <sub>15</sub> H <sub>9</sub> O <sub>6</sub> ] <sup>-</sup><br>284.0329(-0.8) [Y <sub>0</sub> -H <sup>+</sup> ] <sup>+</sup><br>[C <sub>15</sub> H <sub>8</sub> O <sub>6</sub> ] <sup>+</sup><br>255.0302(-1.1) [Y <sub>0</sub> -2H-CO] <sup>-</sup><br>[C <sub>14</sub> H <sub>7</sub> O <sub>5</sub> ] <sup>-</sup> | Kae-3-O-rutinoside   | 3  | 3  |
|                      | 19.87               | 7.03  | 264, 347                | C <sub>21</sub> H <sub>20</sub> O <sub>11</sub> | 447.0935           | 447.0933              | -0.4            | 285.0397 (0.8) [Y <sub>0</sub> ] <sup>-</sup> [C <sub>15</sub> H <sub>9</sub> O <sub>6</sub> ] <sup>-</sup><br>284.0331 (-1.6) [Y <sub>0</sub> -H <sup>+</sup> ] <sup>+</sup><br>[C <sub>15</sub> H <sub>8</sub> O <sub>6</sub> ] <sup>+</sup><br>255.0303(-1.6) [Y <sub>0</sub> -2H-CO] <sup>-</sup><br>[C <sub>14</sub> H <sub>7</sub> O <sub>5</sub> ] <sup>-</sup>                                                                                    | Kae-3-O-glu*         | 4  | 4  |
|                      | 20.33               | 7.49  | 264, 348                | C <sub>23</sub> H <sub>22</sub> O <sub>12</sub> | 489.1044           | 489.1 <sup>o</sup> 38 | -1.1            | 285.0397 (2.7) [Y <sub>0</sub> ] <sup>-</sup> [C <sub>15</sub> H <sub>9</sub> O <sub>6</sub> ] <sup>-</sup><br>284.0329 (-0.9) [Y <sub>0</sub> -H <sup>+</sup> ] <sup>+</sup><br>[C <sub>15</sub> H <sub>8</sub> O <sub>6</sub> ] <sup>+</sup><br>255.0305(-2.6) [Y <sub>0</sub> -2H-CO] <sup>-</sup><br>[C <sub>14</sub> H <sub>7</sub> O <sub>5</sub> ] <sup>-</sup>                                                                                    | Kae-O-acetyl-hex     | 5  | 5  |
| <i>Pistacia vera</i> | 17.25               | 5.71  | 264, 358                | C <sub>21</sub> H <sub>18</sub> O <sub>14</sub> | 493.0628           | 493.0624              | -0.8            | 317.0307 (-1.3)[Y <sub>0</sub> ] <sup>-</sup> [C <sub>15</sub> H <sub>9</sub> O <sub>8</sub> ] <sup>-</sup><br><br>299.0204 (-2.1) [C <sub>15</sub> H <sub>7</sub> O <sub>7</sub> ] <sup>-</sup>                                                                                                                                                                                                                                                          | Myr-3-O-glr          | 1  | 1  |
|                      |                     |       |                         | C <sub>21</sub> H <sub>20</sub> O <sub>13</sub> | 479.0834           | 479.0831              | -0.6            | 316.0227(-0.6) [Y <sub>0</sub> -H <sup>+</sup> ] <sup>+</sup><br>[C <sub>15</sub> H <sub>8</sub> O <sub>8</sub> ] <sup>+</sup><br>287.0206(-3.0) [Y <sub>0</sub> -2H-CO] <sup>-</sup><br>[C <sub>14</sub> H <sub>7</sub> O <sub>7</sub> ] <sup>-</sup>                                                                                                                                                                                                    | Myr-3-O-glu          |    |    |

| Textile $t_R$ (min) |       | $\lambda_{max}$<br>(nm) | MF                                              | [M-H] <sup>-</sup> |            | $\Delta$<br>ppm | MS/MS<br>$m/z$ ( $\Delta$ ppm)(attribution)]                                                                                                                                                                                                                                                                                                                                                                                                                                                 | Proposed<br>compound | PI   | Tx   |
|---------------------|-------|-------------------------|-------------------------------------------------|--------------------|------------|-----------------|----------------------------------------------------------------------------------------------------------------------------------------------------------------------------------------------------------------------------------------------------------------------------------------------------------------------------------------------------------------------------------------------------------------------------------------------------------------------------------------------|----------------------|------|------|
| HPLC                | UHPLC |                         |                                                 | Meas. $m/z$        | Cal. $m/z$ |                 |                                                                                                                                                                                                                                                                                                                                                                                                                                                                                              |                      |      |      |
| 17.88               | 5.91  | 278, 354                | C <sub>28</sub> H <sub>24</sub> O <sub>16</sub> | 615.0992           | 615.0992   | -0.1            | 463.0887 (-1.0) [Y <sub>1</sub> ] <sup>-</sup><br>[C <sub>21</sub> H <sub>19</sub> O <sub>12</sub> ] <sup>-</sup><br>301.0349 (1.7) [Y <sub>0</sub> ] <sup>-</sup> [C <sub>15</sub> H <sub>9</sub> O <sub>7</sub> ] <sup>-</sup><br>300.0281 (-1.7) [Y <sub>0</sub> -H <sup>+</sup> ] <sup>-</sup><br>[C <sub>15</sub> H <sub>8</sub> O <sub>7</sub> ] <sup>-</sup><br>271.0260 (-1.8) [Y <sub>0</sub> -2H-CO] <sup>-</sup><br>[C <sub>14</sub> H <sub>7</sub> O <sub>6</sub> ] <sup>-</sup> | Que-3-galloyl-glu    | 2    | 2    |
| 18.62               | 6.45  | 258, 355                | C <sub>21</sub> H <sub>18</sub> O <sub>13</sub> | 477.0675           | 477.0675   | -0.1            | 301.0356 (-0.7) [Y <sub>0</sub> ] <sup>-</sup> [C <sub>15</sub> H <sub>9</sub> O <sub>7</sub> ] <sup>-</sup><br>273.0407 (-0.9) [Y <sub>0</sub> -CO] <sup>-</sup><br>[C <sub>14</sub> H <sub>9</sub> O <sub>6</sub> ] <sup>-</sup>                                                                                                                                                                                                                                                           | Que-3-O-glr          | 3    | 3    |
|                     |       |                         | C <sub>21</sub> H <sub>20</sub> O <sub>12</sub> | 463.0883           | 463.0882   | -0.3            | 300.0220 (-4.8) [Y <sub>0</sub> -H <sup>+</sup> ] <sup>-</sup><br>[C <sub>15</sub> H <sub>8</sub> O <sub>7</sub> ] <sup>-</sup><br>271.0251 (-1.2) [Y <sub>0</sub> -2H-CO] <sup>-</sup><br>[C <sub>14</sub> H <sub>7</sub> O <sub>5</sub> ] <sup>-</sup>                                                                                                                                                                                                                                     | Que-3-O-glu          |      |      |
| 19.10               | 6.82  | 265; 358                | C <sub>20</sub> H <sub>18</sub> O <sub>11</sub> | 433.0777           | 433.0776   | -0.2            | 300.0285 (-4.4) [Y <sub>0</sub> -H <sup>+</sup> ] <sup>-</sup><br>[C <sub>15</sub> H <sub>8</sub> O <sub>7</sub> ] <sup>-</sup><br>271.0265 (-4.8) [Y <sub>0</sub> -2H-CO] <sup>-</sup><br>[C <sub>14</sub> H <sub>7</sub> O <sub>6</sub> ] <sup>-</sup>                                                                                                                                                                                                                                     | Que-3-O-pen          | 4    | 4    |
| -                   | 6.98  | n.a.                    | C <sub>21</sub> H <sub>20</sub> O <sub>11</sub> | 447.0940           | 447.0933   | -1.6            | 285.0406 (-0.3) [Y <sub>0</sub> ] <sup>-</sup> [C <sub>15</sub> H <sub>9</sub> O <sub>6</sub> ] <sup>-</sup><br>284.0331 (-1.6) [Y <sub>0</sub> -H <sup>+</sup> ] <sup>-</sup><br>[C <sub>15</sub> H <sub>8</sub> O <sub>6</sub> ] <sup>-</sup>                                                                                                                                                                                                                                              | Lut-7-O-glu*         | n.a. | n.a. |
| 19.82               | 7.69  | 266, 352                | C <sub>28</sub> H <sub>22</sub> O <sub>17</sub> | 629.07837          | 629.0784   | -0.4            | 477.0674 (0.1) [Y <sub>1</sub> ] <sup>-</sup> [C <sub>21</sub> H <sub>17</sub> O <sub>13</sub> ] <sup>-</sup><br>301.0357 (-1.1) [Y <sub>0</sub> ] <sup>-</sup> [C <sub>15</sub> H <sub>9</sub> O <sub>7</sub> ] <sup>-</sup>                                                                                                                                                                                                                                                                | Que-galloyl-glr      | 5    | 5    |
| 22.00               | 9.16  | 254, 350                | C <sub>15</sub> H <sub>10</sub> O <sub>6</sub>  | 285.0411           | 285.0405   | -2.4            | 151.0035 (-1.0) [ <sup>1,3</sup> A] <sup>-</sup> [C <sub>7</sub> H <sub>3</sub> O <sub>4</sub> ] <sup>-</sup><br>133.0284 (8.7) [ <sup>1,3</sup> B] <sup>-</sup> [C <sub>8</sub> H <sub>5</sub> O <sub>2</sub> ] <sup>-</sup>                                                                                                                                                                                                                                                                | Lut*                 | 6    | 6    |

|                          | Textile $t_R$ (min) |       | $\lambda_{max}$<br>(nm) | MF                                              | [M-H] <sup>-</sup>    |            | $\Delta$<br>ppm | MS/MS<br>[ $m/z$ ( $\Delta$ ppm)(attribution)]                                                                                                                                                                                                  | Proposed<br>compound            | PI | Tx |
|--------------------------|---------------------|-------|-------------------------|-------------------------------------------------|-----------------------|------------|-----------------|-------------------------------------------------------------------------------------------------------------------------------------------------------------------------------------------------------------------------------------------------|---------------------------------|----|----|
|                          | HPLC                | UHPLC |                         |                                                 | Meas. $m/z$           | Cal. $m/z$ |                 |                                                                                                                                                                                                                                                 |                                 |    |    |
| <i>Prangos ferulacea</i> | 18.60               | 6.43  | 256, 354                | C <sub>21</sub> H <sub>18</sub> O <sub>13</sub> | 477.0681              | 477.0675   | -1.3            | 301.0358 (-1.8) [Y <sub>0</sub> ] <sup>-</sup> [C <sub>15</sub> H <sub>9</sub> O <sub>7</sub> ] <sup>-</sup>                                                                                                                                    | Que-3-O-gl <sup>r</sup> *       | 1  | 1  |
|                          | 20.33               | 7.24  | 254, 352                | C <sub>22</sub> H <sub>20</sub> O <sub>13</sub> | 491.0832              | 491.0831   | -0.1            | 315.0515 (-1.4) [Y <sub>0</sub> ] <sup>-</sup> [C <sub>16</sub> H <sub>11</sub> O <sub>7</sub> ] <sup>-</sup>                                                                                                                                   | Irh-3-O-gl <sup>r</sup>         | 2  | 2  |
|                          |                     |       |                         |                                                 |                       |            |                 | 271.0252 (-1.4) [Y <sub>0</sub> -2H-CO] <sup>-</sup><br>[C <sub>14</sub> H <sub>7</sub> O <sub>6</sub> ] <sup>-</sup>                                                                                                                           |                                 |    |    |
| <i>Punica granatum</i>   | 3.73                | 2.24  | 257, 376                | C <sub>34</sub> H <sub>22</sub> O <sub>22</sub> | 781.0521              | 781.0530   | 0.9             | 600.9899 (-0.5) [C <sub>28</sub> H <sub>7</sub> O <sub>16</sub> ] <sup>-</sup>                                                                                                                                                                  | Punicalin                       | 1  | 1  |
|                          |                     |       |                         |                                                 |                       |            |                 | 300.9993 (-1.1)[Y <sub>0</sub> ] <sup>-</sup> [C <sub>14</sub> H <sub>5</sub> O <sub>8</sub> ] <sup>-</sup>                                                                                                                                     |                                 |    |    |
|                          | 6.05                | 3.02  | 257, 377                | C <sub>48</sub> H <sub>28</sub> O <sub>30</sub> | 541.0266 <sup>#</sup> | 541.0260   | -0.6            | [782.0564 (4.2) + 300.9995 (-1.6)<br>[C <sub>34</sub> H <sub>22</sub> O <sub>22</sub> ] <sup>-</sup> + [C <sub>14</sub> H <sub>5</sub> O <sub>8</sub> ] <sup>-</sup>                                                                            | Punicalagin A                   | 2  | 2  |
|                          | 8.89                | 3.69  | 257, 378                | C <sub>48</sub> H <sub>28</sub> O <sub>30</sub> | 541.0268 <sup>#</sup> | 541.0260   | -0.7            | [782.0564 (4.2) + 300.9995 (-1.6)<br>[C <sub>34</sub> H <sub>22</sub> O <sub>22</sub> ] <sup>-</sup> + [C <sub>14</sub> H <sub>5</sub> O <sub>8</sub> ] <sup>-</sup>                                                                            | Punicalagin B                   | 3  | 3  |
|                          | 15.51               | 5.46  | 256, 362                | C <sub>27</sub> H <sub>22</sub> O <sub>18</sub> | 633.0629              | 633.0733   | -0.8            | 463.0523 (-1.1) [C <sub>20</sub> H <sub>15</sub> O <sub>13</sub> ] <sup>-</sup><br>300.9989 (0.4) [Y <sub>0</sub> ] <sup>-</sup> [C <sub>14</sub> H <sub>5</sub> O <sub>8</sub> ] <sup>-</sup>                                                  | Galloy-HHDP-hex                 | 4  | 4  |
|                          | 16.45               | 5.70  | 254, 377                | C <sub>19</sub> H <sub>14</sub> O <sub>12</sub> | 433.0403              | 433.0412   | 0.9             | 300.9987 (1.0) [Y <sub>0</sub> ] <sup>-</sup> [C <sub>14</sub> H <sub>5</sub> O <sub>8</sub> ] <sup>-</sup><br>299.9911 (0.2) [Y <sub>0</sub> -H <sup>+</sup> ] <sup>•</sup><br>[C <sub>14</sub> H <sub>4</sub> O <sub>8</sub> ] <sup>•</sup>   | Ellagic acid-<br>xylopyranoside | 5  | 5  |
|                          | 17.01               | 5.88  | 252, 359                | C <sub>20</sub> H <sub>16</sub> O <sub>12</sub> | 447.0565              | 447.0569   | 0.4             | 300.9978 (4.1) [Y <sub>0</sub> ] <sup>-</sup> [C <sub>14</sub> H <sub>5</sub> O <sub>8</sub> ] <sup>-</sup><br>299.9913 (-0.4) [Y <sub>0</sub> -H <sup>+</sup> ] <sup>•</sup><br>[C <sub>14</sub> H <sub>4</sub> O <sub>8</sub> ] <sup>•</sup>  | Ellagic acid-rhamnoside         | 6  | 6  |
|                          | 19.38               | 6.24  | 250, 368                | C <sub>14</sub> H <sub>6</sub> O <sub>8</sub>   | 300.9996              | 300.9990   | -0.6            | 273.0047 (-0.7) [C <sub>13</sub> H <sub>5</sub> O <sub>7</sub> ] <sup>-</sup><br>257.0096 (-1.8) [C <sub>13</sub> H <sub>5</sub> O <sub>6</sub> ] <sup>-</sup><br>229.0145 (-1.0) [C <sub>12</sub> H <sub>5</sub> O <sub>5</sub> ] <sup>-</sup> | Ellagic acid*                   | 7  | 7  |

|                           | Textile $t_R$ (min) |       | $\lambda_{max}$<br>(nm) | MF                                              | [M-H] <sup>-</sup> |            | $\Delta$<br>ppm | MS/MS<br>[ $m/z$ ( $\Delta$ ppm)(attribution)]                                                                                                                                                                                                                                                                                                                           | Proposed<br>compound   | PI   | Tx   |
|---------------------------|---------------------|-------|-------------------------|-------------------------------------------------|--------------------|------------|-----------------|--------------------------------------------------------------------------------------------------------------------------------------------------------------------------------------------------------------------------------------------------------------------------------------------------------------------------------------------------------------------------|------------------------|------|------|
|                           | HPLC                | UHPLC |                         |                                                 | Meas. $m/z$        | Cal. $m/z$ |                 |                                                                                                                                                                                                                                                                                                                                                                          |                        |      |      |
| <i>Vitis<br/>vinifera</i> | 18.60               | 6.46  | 256, 354                | C <sub>21</sub> H <sub>18</sub> O <sub>13</sub> | 477.0675           | 477.0675   | -0.1            | 301.0356 (0.6) [Y <sub>0</sub> ] <sup>-</sup> [C <sub>15</sub> H <sub>9</sub> O <sub>7</sub> ] <sup>-</sup>                                                                                                                                                                                                                                                              | Que-O- <i>glr</i> *    | 1    | 1    |
|                           | -                   | 6.81  | n.a.                    | C <sub>21</sub> H <sub>20</sub> O <sub>11</sub> | 447.0931           | 447.0933   | 0.3             | 284.0331 (-1.6) [Y <sub>0</sub> -H <sup>+</sup> ] <sup>•-</sup><br>[C <sub>15</sub> H <sub>8</sub> O <sub>6</sub> ] <sup>•-</sup><br>255.0300(-0.2)[Y <sub>0</sub> -2H-CO] <sup>-</sup><br>[C <sub>14</sub> H <sub>7</sub> O <sub>5</sub> ] <sup>-</sup>                                                                                                                 | Kae- <i>glu</i> isomer | n.a. | n.a. |
|                           | 19.80               | 7.02  | 264, 348                | C <sub>21</sub> H <sub>20</sub> O <sub>11</sub> | 447.0933           | 447.0933   | 0.0             | 285.0404 (0.1) [Y <sub>0</sub> ] <sup>-</sup> [C <sub>15</sub> H <sub>9</sub> O <sub>6</sub> ] <sup>-</sup><br>284.0331 (-1.6) [Y <sub>0</sub> -H <sup>+</sup> ] <sup>•-</sup><br>[C <sub>15</sub> H <sub>8</sub> O <sub>6</sub> ] <sup>•-</sup><br>255.0306(-2.6) [Y <sub>0</sub> -2H-CO] <sup>-</sup><br>[C <sub>14</sub> H <sub>7</sub> O <sub>5</sub> ] <sup>-</sup> | Kae-3-O- <i>glu</i> *  | 2    | 2    |
|                           | 21.23               | 9.27  | 254, 370                | C <sub>15</sub> H <sub>10</sub> O <sub>7</sub>  | 301.0357           | 301.0354   | -1.0            | 151.0030 (4.4) [ <sup>1,3</sup> A] <sup>-</sup> [C <sub>7</sub> H <sub>3</sub> O <sub>4</sub> ] <sup>-</sup><br>121.0280 (10.0) [ <sup>1,2</sup> B] <sup>-</sup> [C <sub>7</sub> H <sub>3</sub> O <sub>2</sub> ] <sup>-</sup>                                                                                                                                            | Que*                   | n.a. | 3    |
|                           |                     |       |                         |                                                 |                    |            |                 |                                                                                                                                                                                                                                                                                                                                                                          |                        |      |      |

Abbreviations: Que, quercetin; Kae, kaempferol; Lut, luteolin; Irlh, isorhamnetin; rha, rhamnose; glc, glucoside; glr, glucuronide; gly, glycoside; deoxyhex, deoxyhexoside; hex, hexoside; pen, pentoside; rut, rutinoside.

<sup>#</sup> Double charged deprotonated molecules [M-2H]<sup>2-</sup>

\* Identified with an analytical standard
