# Supplementary figures and images for: Traditional Yellow Dyes Used in the 21st Century in Central Iran: The Knowledge of Master Dyers Revealed by HPLC-DAD and UHPLC-HRMS/MS
Source: MDPI journal article supplement (doi:10.3390/molecules25040908), 2020-02-18

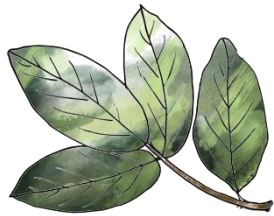

**Leaves**

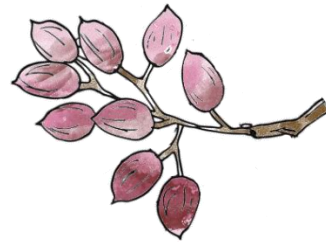

**Cluster**

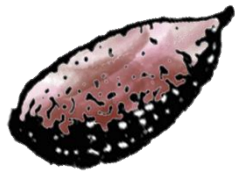

**Fleshy hull (epicarp and mesocarp)**

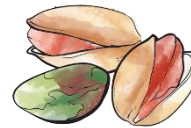

**Seed and shell (endocarp)**

Supplement: s1 [file s1]
